# Supplementary material for: Identifying the preferable rheumatoid arthritis subgroups for intervention with the anti-RANKL antibody denosumab to reduce progression of joint destruction
Source: PubMed Central journal article supplement — RMD Open. 2020 Jul 30;6(2):e001249. doi: 10.1136/rmdopen-2020-001249 (PMC7722273; doi:10.1136/rmdopen-2020-001249), 2020-07-30
Supplement: rmdopen-2020-001249supp001.pdf [file rmdopen-2020-001249supp001.pdf]

## Supplementary Material

**Table S1.** Changes in mTSS based on different subgroup analyses (including GC, CCP antibody, and baseline ES)

|                        |                    | Placebo<br>(N=306) | Denosumab         |                   |
|------------------------|--------------------|--------------------|-------------------|-------------------|
|                        |                    |                    | Q6M<br>(N=302)    | Q3M<br>(N=301)    |
| Baseline SJC $\geq$ 10 | N                  | 127                | 115               | 122               |
|                        | Mean (SD)          | 1.43 (3.44)        | 1.10 (3.14)       | 0.76 (2.24)       |
|                        | Median<br>(Q1, Q3) | 0.00 (0.00, 1.50)  | 0.00 (0.00, 1.00) | 0.00 (0.00, 1.00) |
|                        | <i>p</i> -value    | –                  | 0.7198            | 0.0259            |
|                        |                    |                    |                   |                   |
| Baseline SJC <10       | N                  | 179                | 187               | 179               |
|                        | Mean (SD)          | 1.55 (3.93)        | 0.74 (3.39)       | 0.59 (2.11)       |
|                        | Median<br>(Q1, Q3) | 0.00 (0.00, 1.50)  | 0.00 (0.00, 0.50) | 0.00 (0.00, 0.50) |
|                        | <i>p</i> -value    | –                  | 0.0006            | 0.0023            |
|                        |                    |                    |                   |                   |
| Baseline TJC $\geq$ 6  | N                  | 160                | 143               | 155               |

|                                  |                    |                   |                   |                   |
|----------------------------------|--------------------|-------------------|-------------------|-------------------|
|                                  | Mean (SD)          | 1.77 (4.26)       | 1.09 (3.37)       | 0.88 (2.66)       |
|                                  | Median<br>(Q1, Q3) | 0.00 (0.00, 2.00) | 0.00 (0.00, 1.00) | 0.00 (0.00, 1.00) |
|                                  | <i>p</i> -value    | –                 | 0.0083            | 0.0027            |
| Baseline TJC 3–5                 | N                  | 46                | 67                | 63                |
|                                  | Mean (SD)          | 1.56 (3.46)       | 1.03 (4.30)       | 0.36 (1.44)       |
|                                  | Median<br>(Q1, Q3) | 0.00 (0.00, 1.00) | 0.00 (0.00, 1.07) | 0.00 (0.00, 0.00) |
|                                  | <i>p</i> -value    | –                 | 0.6393            | 0.0152            |
| Baseline TJC $\leq$ 2            | N                  | 100               | 92                | 83                |
|                                  | Mean (SD)          | 1.04 (2.82)       | 0.43 (2.12)       | 0.46 (1.44)       |
|                                  | Median<br>(Q1, Q3) | 0.00 (0.00, 1.00) | 0.00 (0.00, 0.50) | 0.00 (0.00, 0.50) |
|                                  | <i>p</i> -value    | –                 | 0.0798            | 0.2881            |
| Baseline CRP $\geq$ 1.0<br>mg/dL | N                  | 44                | 56                | 38                |
|                                  | Mean (SD)          | 3.34 (6.47)       | 2.49 (5.72)       | 2.49 (4.14)       |
|                                  | Median             | 1.00 (0.00, 3.25) | 0.50 (0.00, 2.13) | 1.18 (0.00, 3.81) |

|                   |                 |                   |                   |                   |
|-------------------|-----------------|-------------------|-------------------|-------------------|
|                   | (Q1, Q3)        |                   |                   |                   |
|                   | <i>p</i> -value | –                 | 0.3339            | 0.7377            |
| Baseline CRP <1.0 | N               | 262               | 246               | 263               |
| mg/dL             | Mean (SD)       | 1.19 (2.95)       | 0.51 (2.30)       | 0.39 (1.54)       |
|                   | Median          | 0.00 (0.00, 1.13) | 0.00 (0.00, 0.50) | 0.00 (0.00, 0.50) |
|                   | (Q1, Q3)        |                   |                   |                   |
|                   | <i>p</i> -value | –                 | 0.0007            | 0.0001            |
| Baseline ESR ≥28  | N               | 80                | 96                | 91                |
| mm/h              | Mean (SD)       | 2.77 (5.44)       | 1.89 (4.93)       | 1.71 (3.25)       |
|                   | Median          | 1.00 (0.00, 3.00) | 0.25 (0.00, 2.00) | 0.50 (0.00, 2.50) |
|                   | (Q1, Q3)        |                   |                   |                   |
|                   | <i>p</i> -value | –                 | 0.1760            | 0.2472            |
| Baseline ESR <28  | N               | 226               | 206               | 210               |
| mm/h              | Mean (SD)       | 1.05 (2.77)       | 0.41 (2.00)       | 0.20 (1.21)       |
|                   | Median          | 0.00 (0.00, 1.00) | 0.00 (0.00, 0.00) | 0.00 (0.00, 0.00) |
|                   | (Q1, Q3)        |                   |                   |                   |

|                            |                 |                   |                   |                   |
|----------------------------|-----------------|-------------------|-------------------|-------------------|
|                            | <i>p</i> -value | –                 | 0.0018            | <0.0001           |
| Glucocorticoid use present | N               | 106               | 109               | 106               |
|                            | Mean (SD)       | 1.97 (4.78)       | 0.82 (3.25)       | 0.53 (1.47)       |
|                            | Median (Q1, Q3) | 0.00 (0.00, 2.00) | 0.00 (0.00, 1.00) | 0.00 (0.00, 0.50) |
|                            | <i>p</i> -value | –                 | 0.0169            | 0.0123            |
| Glucocorticoid use absent  | N               | 200               | 193               | 195               |
|                            | Mean (SD)       | 1.25 (3.01)       | 0.91 (3.34)       | 0.73 (2.46)       |
|                            | Median (Q1, Q3) | 0.00 (0.00, 1.50) | 0.00 (0.00, 0.50) | 0.00 (0.00, 0.50) |
|                            | <i>p</i> -value | –                 | 0.0445            | 0.0046            |
| RF status positive         | N               | 197               | 199               | 184               |
|                            | Mean (SD)       | 1.94 (4.35)       | 1.08 (3.75)       | 0.99 (2.60)       |
|                            | Median (Q1, Q3) | 0.50 (0.00, 2.00) | 0.00 (0.00, 1.00) | 0.00 (0.00, 1.43) |

|                               |                    |                   |                    |                     |
|-------------------------------|--------------------|-------------------|--------------------|---------------------|
|                               | <i>p</i> -value    | –                 | 0.0072             | 0.0048              |
| RF status negative            | N                  | 109               | 103                | 117                 |
|                               | Mean (SD)          | 0.70 (1.99)       | 0.50 (2.14)        | 0.13 (0.99)         |
|                               | Median<br>(Q1, Q3) | 0.00 (0.00, 0.50) | 0.000 (0.00, 0.00) | 0.000 (0.000, 0.00) |
|                               | <i>p</i> -value    | –                 | 0.0722             | 0.0230              |
| Anti-CCP antibody<br>positive | N                  | 211               | 228                | 213                 |
|                               | Mean (SD)          | 2.10 (4.33)       | 1.15 (3.69)        | 0.89 (2.49)         |
|                               | Median<br>(Q1, Q3) | 0.50 (0.00, 2.50) | 0.00 (0.00, 1.16)  | 0.00 (0.00, 1.00)   |
|                               | <i>p</i> -value    | –                 | 0.0008             | <0.0001             |
| Anti-CCP antibody<br>negative | N                  | 95                | 74                 | 88                  |
|                               | Mean (SD)          | 0.16 (0.82)       | 0.03 (1.26)        | 0.10 (0.77)         |
|                               | Median<br>(Q1, Q3) | 0.00 (0.00, 0.00) | 0.00 (0.00, 0.00)  | 0.00 (0.00, 0.00)   |
|                               | <i>p</i> -value    | –                 | 0.1193             | 0.5763              |

|                       |                    |                   |                   |                   |
|-----------------------|--------------------|-------------------|-------------------|-------------------|
| Baseline mTSS<br>≥6.5 | N                  | 140               | 165               | 157               |
|                       | Mean (SD)          | 2.42 (4.98)       | 1.51 (4.32)       | 1.14 (2.80)       |
|                       | Median<br>(Q1, Q3) | 0.50 (0.00, 3.00) | 0.00 (0.00, 1.50) | 0.00 (0.00, 1.50) |
|                       | <i>p</i> -value    | .                 | 0.0748            | 0.0245            |
| Baseline mTSS<br><6.5 | N                  | 166               | 137               | 144               |
|                       | Mean (SD)          | 0.72 (1.86)       | 0.12 (0.70)       | 0.13 (0.84)       |
|                       | Median<br>(Q1, Q3) | 0.00 (0.00, 1.00) | 0.00 (0.00, 0.00) | 0.00 (0.00, 0.00) |
|                       | <i>p</i> -value    | .                 | 0.0002            | <.0001            |
| Baseline ES ≥3.5      | N                  | 140               | 168               | 169               |
|                       | Mean (SD)          | 2.44 (4.99)       | 1.36 (4.16)       | 1.02 (2.77)       |
|                       | Median<br>(Q1, Q3) | 0.50 (0.00, 3.25) | 0.00 (0.00, 1.50) | 0.00 (0.00, 1.36) |
|                       | <i>p</i> -value    | .                 | 0.0345            | 0.0034            |
| Baseline ES <3.5      | N                  | 166               | 134               | 132               |
|                       | Mean (SD)          | 0.70 (1.83)       | 0.28 (1.49)       | 0.19 (0.70)       |
|                       | Median<br>(Q1, Q3) | 0.00 (0.00, 1.00) | 0.00 (0.00, 0.00) | 0.00 (0.00, 0.00) |
|                       | <i>p</i> -value    | .                 | 0.0007            | 0.0012            |

CCP, cyclic citrullinated peptide; CRP, C-reactive protein; ES, bone erosion score; ESR, erythrocyte sedimentation rate; mTSS, modified total Sharp score; Q3M, denosumab 60 mg every 3 months; Q6M, denosumab 60 mg every 6 months; RF, rheumatoid factor; SJC, swollen joint count; TJC, tender joint count.
